# Supplementary material
Source: Springer Nature journal article supplement (https://www.springermedizin.de/resource/supplementary/13034_2013_245_MOESM2_ESM.pdf/9652628)

# Estimated Marginal Means of Time

Estimated Marginal Means

18  
17.5  
17  
16.5  
16

Pre

Post

States

Groups

Yoga

Physical exercise

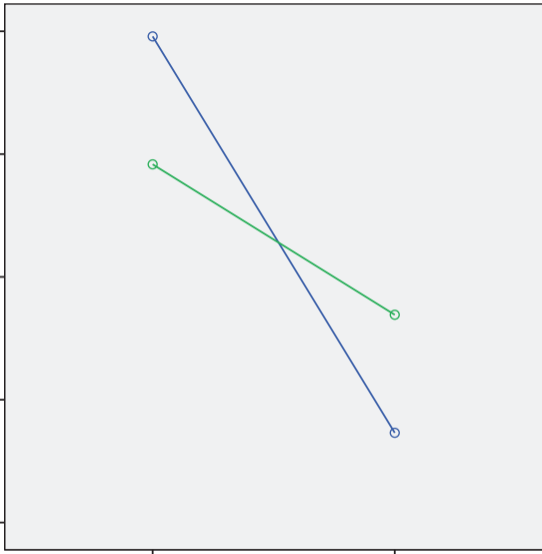

Supplement: MOESM2 [file 9652628]
